# Supplementary material for: Internet-Based Treatment for Adults with Depressive Symptoms: Randomized Controlled Trial
Source: PubMed Central journal article supplement (PMC2629364; doi:10.2196/jmir.1094), 2008-11-20
Supplement: jmir_v10i4e44_app1.pdf [file jmir_v10i4e44_app1.pdf]

# Multimedia Appendix: Screenshots

J Med Internet Res 10(4):e44  
<http://www.jmir.org/2008/4/e44/>

## PST Intervention

The screenshot shows a Microsoft Internet Explorer browser window displaying a course page. The browser's address bar shows the URL: <http://allesondercontrole.psy.vu.nl/didactor/education/index.jsp?provider=331&education=627&class=null>. The page title is "Zorgen en problemen overwinnen door zelfanalyse". The browser's taskbar at the bottom shows several open applications, including "Postvak IN - Microsof...", "Literatuur", "effects\_final\_revised...", "Document2 - Microsof...", "Leeromgeving - Micro...", and "Reference Manager - ...".

The course page content includes a navigation menu on the left with the following items:

- Alles onder controle
- Opleiding
- Alles onder controle
- Les 1. Wat is echt belangrijk in uw leven?
- Uitleg
- Deel 1: belangrijke dingen
- Deel 2: problemen en zorgen
- Voorbeelden les 1
- Huiswerk les 1
- Les 2. Oplossen van problemen - introductie
- Les 3. Oplossen van problemen - blijven doen
- Les 4. Oplossen van problemen - al effect?
- Les 5. Maak een plan voor de toekomst
- Verantwoording en Personalia

The main content area is titled "Deel 2: problemen en zorgen". It contains the following text:

In het tweede onderdeel van deze les is het de bedoeling dat u in 10 minuten tijd opschrijft wat u allemaal dwarszit, uw zorgen, dingen waar u zich depressief, gespannen, angstig over voelt.

**Alles opschrijven.** Het is de bedoeling dat u alles opschrijft wat u maar kunt bedenken. Wees zo volledig mogelijk. Het maakt niet uit of het klein of groot is. Kijk ook weer eens bij de Voorbeelden in het menu links. U vindt daar het lijstje van problemen van Herman, Mariëlle en Hettie.

**Indeling.** Zodra u uw lijst van 'problemen en zorgen' af heeft, is het de bedoeling dat u elk probleem indeelt in een van de volgende drie soorten problemen en zorgen:

- Niet belangrijk of relevant;
- Belangrijk en oplosbaar;
- Belangrijk en *niet* oplosbaar.

**Niet belangrijk of relevant.** Dit doet u door de problemen en zorgen van uw lijst te vergelijken met de lijst van dingen die werkelijk belangrijk zijn in uw leven. U zult dan een aantal problemen en zorgen ontdekken die niets te maken hebben met wat belangrijk voor u is. Deze zijn dan meestal ook niet belangrijk om u mee bezig te houden. Toch is het soms moeilijk deze problemen en zorgen van u af te zetten. Hoe u daar het beste mee om kunt gaan komt bij Les 2 aan de orde.

**Belangrijk en oplosbaar.** U zult ook een aantal problemen en zorgen hebben die heel belangrijk zijn om actief mee aan de slag te gaan, omdat ze alles te maken hebben met die gebieden die in uw leven het belangrijkste voor u zijn. Veel van deze problemen zijn oplosbaar, ook al is de oplossing soms niet gemakkelijk te bereiken. Hoe u met oplosbare problemen aan de slag kunt leest u in Les 2.

**Belangrijk en *niet* oplosbaar.** Als laatste zijn er problemen die heel belangrijk voor u zijn, maar die niet op te lossen zijn, zoals de dood van Hettie's moeder twee jaar geleden of de diabetes van Mariëlla. Zulke ingrijpende gebeurtenissen hebben ook vaak weinig te maken met de dingen die iemand echt belangrijk vindt, maar deze punten horen natuurlijk niet tot de onbelangrijke of irrelevante problemen. In Les 2 leest u welke dingen u kunnen helpen om dergelijke situaties een plek te geven in uw leven.

Ga nu naar het Huiswerk van les 1.

# CBT Intervention

The screenshot shows a Microsoft Internet Explorer browser window with the address bar displaying <https://www.kleurjeleven.nl/>. The website content is displayed on a yellow background with a row of colorful pencils at the top. The text is organized into three columns:

- Wat is Kleur je leven?**

Leven met plezier, de toekomst positief en met zelfvertrouwen tegemoet zien. Soms valt dat niet mee, zeker niet voor mensen die zich somber voelen. Wat hulp is dan welkom. De internetcursus 'Kleur je Leven' biedt die hulp. In 8 lessen en 1 opfrislees leert u individueel uw stemming te verbeteren. U volgt 1 les per week op de dag en het tijdstip dat het u schikt. De lessen bestaan uit schriftelijke en gesproken informatie, korte films en opdrachten. Deelname aan de cursus is gratis. Klik op [demonstratie](#) voor een indruk van de cursus!
- Voor wie is Kleur je leven?**

De cursus is voor mensen die individueel hun sombere gevoelens willen aanpakken. Er is een cursus voor mensen vanaf 18 en 55 jaar. Onderzoek laat zien dat de cursus voor ouderen effectief is! Het effect van de cursus voor 18+ wordt nu onderzocht. Voor de cursus heeft u een computer (PC) met internetverbinding en een e-mailadres nodig.
- Wilt u Deelnemen?**

Kleur je Leven wordt aangeboden door 8 regionale GGZ-instellingen. Iedere instelling biedt de cursus en informatie daarover via een eigen website aan. Vul uw postcode en leeftijd in om (geheel vrijblijvend) naar een van deze Kleur je Leven websites te gaan. U kunt zich daar aanmelden.

Below the text is a small image of a pencil sharpener. To the right of the sharpener is a registration form titled "Ga verder" with the following fields:

- Vul uw postcode in (alleen de cijfers):
- Leeftijd:  tot 55 jaar  55 jaar of ouder
- A button with a right-pointing arrow.

At the bottom of the page, there is a footer with the logo for "Timbos Instituut" and the text "Home | Colofon | Copyright 2007 | Webmaster".

The Windows taskbar at the bottom shows the Start button and several open applications: Postvak IN - Microsof..., JMR, Microsoft Outlook We..., Vertalen .nu : vertali..., Kleur je leven - Micro..., and effects\_final\_revised... The system clock shows 13:41.
